# Supplementary material for: Redox-active phosphines: synthesis and crystal structures of palladium(ii) complexes of a metallaphosphine in two different oxidation states
Source: Royal Society of Chemistry journal article supplement (doi:10.1039/c4dt00455h), 2014-01-01
Supplement: c4dt00455h1.pdf [file c4dt00455h1.pdf]

## Supporting Information for Reviewers Only

**Ayham Tohmé<sup>a</sup>, Stéphanie Labouille<sup>b</sup>, Thierry Roisnel<sup>a</sup>, Vincent Dorcet<sup>a</sup>,**

**Duncan Carmichael<sup>b\*</sup> and Frédéric Paul\***

**Redox-active Phosphines: Synthesis and Crystal Structures of Palladium(II) Complexes  
that contain Metallaphosphines in Two different Oxidation States.**

**Including:**

- |                                                                         |       |
|-------------------------------------------------------------------------|-------|
| <b>1. Synthesis of Pd(II) Complexes with Fe(II) Metallo-Phosphanes</b>  | p. S2 |
| <b>2. Synthesis of Pd(II) Complexes with Fe(III) Metallo-Phosphanes</b> | p. S3 |
| <b>3. Evans Measurements on 4 and 6</b>                                 | p. S4 |
| <b>4. Reaction of 4 with 2</b>                                          | p. S5 |
| <b>5. Cyclic Voltammograms of 3 and 5</b>                               | p. S6 |

## 1. Synthesis of Pd(II) Complexes with Fe(II) Metallo-Phosphanes

**General.** All reactions and workup procedures were carried out under dry, high purity argon using standard Schlenk techniques. All solvents were freshly distilled and purged with argon before use. Infrared spectra were obtained using a Bruker IFS28 FT-IR spectrometer (400-4000  $\text{cm}^{-1}$ ). NMR spectra were acquired at 298 K on a Bruker DPX200, a Bruker Ascend 400 MHz NMR or a Bruker AVANCE 500, with a 5 mm broadband observe probe equipped with a z-gradient coil. Chemical shifts are given in ppm and referenced to the residual non-deuterated solvent signal for  $^1\text{H}$  and  $^{13}\text{C}$  and external  $\text{H}_3\text{PO}_4$  (0.0 ppm) for  $^{31}\text{P}$  NMR spectra. Cyclic voltammograms were recorded in dry  $\text{CH}_2\text{Cl}_2$  solutions (containing 0.10 M  $[\text{nBu}_4\text{N}][\text{PF}_6]$ , purged with argon and maintained under argon atmosphere) using a Versastat 3 potentiostat in a home-made three-electrode Teflon cell. The working electrode was a Pt disk, the counter electrode a Pt wire and the reference electrode a saturated calomel electrode (SCE). The  $\text{FeCp}_2^{0/1+}$  couple ( $E_{1/2}$ : 0.46 V,  $\Delta E_p = 0.09$  V;  $I_{pa}/I_{pc} = 1$ ) was used as an internal calibrant for the potential measurements. UV-visible spectra were recorded as  $\text{CH}_2\text{Cl}_2$  solutions, using a 1 cm long quartz cell on a Cary 5000 spectrometer. EPR spectra were recorded on a Bruker EMX-8/2.7 (X-band) spectrometer, at 77K. High-resolution mass spectra were performed at the “Centre Regional de Mesures Physiques de l’Ouest” (CRMPO), Université de Rennes 1.

**{[Fe( $\kappa^2$ -dppe)( $\eta^5$ -C<sub>5</sub>Me<sub>5</sub>)(C $\equiv$ CPPh<sub>2</sub>)]Pd( $\mu$ -Cl)Cl<sub>2</sub>} (3).** In a Schlenk tube, Fe( $\kappa^2$ -dppe)( $\eta^5$ -C<sub>5</sub>Me<sub>5</sub>)(C $\equiv$ CPPh<sub>2</sub>) (**1**; 79.9 mg, 0.1 mmol) and [Pd(1,5-cod)Cl<sub>2</sub>] (28.5 mg, 0.1 mmol) were dissolved in dichloromethane (5 mL) and stirred overnight at room temperature. Addition of *n*-pentane and filtration gave the title complex as a blue solid (90 mg, 92%). X-ray quality crystals were grown from slow diffusion of pentane in a dichloromethane solution of the

complex. HRMS: calc: 1948.1611 [ $M^+$ ], found: 1948.1645. IR (KBr,  $\nu$  in  $\text{cm}^{-1}$ ): 1930 (s,  $\text{C}\equiv\text{C}$ ). CV ( $\text{CH}_2\text{Cl}_2$ , vs. SCE, 0.1 M [ $n\text{-Bu}_4\text{N}$ ][ $\text{PF}_6$ ]):  $E^1_{1/2} = 0.16$  V ( $\Delta E_p = 85$  mV),  $E^2_{1/2} = 0.25$  V ( $\Delta E_p = 85$  mV).  $^1\text{H}$  NMR (300 MHz,  $\text{C}_6\text{D}_6$ , ppm):  $\delta = 8.06\text{--}8.01$  (m, 8H,  $H_{\text{aromatics}}$ ), 7.91–7.84 (m, 8H,  $H_{\text{aromatics}}$ ), 7.43–7.38 (m, 8H,  $H_{\text{aromatics}}$ ), 7.19–6.97 (m, 38H,  $H_{\text{aromatics}}$ ), 3.18 (m, 4H,  $\text{CH}_2$  dppe), 1.99 (m, 4H,  $\text{CH}_2$  dppe), 1.41 (s, 30H,  $\text{C}_5(\text{CH}_3)_5$ ).  $^{31}\text{P}$  NMR (121 MHz,  $\text{C}_6\text{D}_6$ , ppm):  $\delta = 97.8$  (s, 4P, dppe),  $-16.8$  (s, 2P,  $\text{PPh}_2$ ).

***trans*-{Fe( $\kappa^2$ -dppe)( $\eta^5$ - $\text{C}_5\text{Me}_5$ )( $\text{C}\equiv\text{CPh}_2$ )} $_2$ PdCl $_2$  (5).** In a Schlenk tube, Fe( $\kappa^2$ -dppe)( $\eta^5$ - $\text{C}_5\text{Me}_5$ )( $\text{C}\equiv\text{CPh}_2$ ) (**1**; 159.8 mg, 0.2 mmol) and [Pd(1,5-cod)Cl $_2$ ] (28.5 mg, 0.1 mmol) were dissolved in dichloromethane (5 mL) and stirred overnight at room temperature. Addition of *n*-pentane and filtration gave the title complex as a purple solid (170 mg, 96%). X-ray quality crystals were grown from slow diffusion of pentane vapours in a benzene solution of the complex. HRMS: calc: 1772.3229 [ $M^+$ ], found: 1772.3235. IR (KBr,  $\nu$  in  $\text{cm}^{-1}$ ): 1948 (s,  $\text{C}\equiv\text{C}$ ). CV ( $\text{CH}_2\text{Cl}_2$ , vs. SCE, 0.1 M [ $n\text{-Bu}_4\text{N}$ ][ $\text{PF}_6$ ]):  $E^1_{1/2} = -0.02$  V ( $\Delta E_p = 77$  mV),  $E^2_{1/2} = 0.11$  V ( $\Delta E_p = 73$  mV).  $^1\text{H}$  NMR (300 MHz,  $\text{C}_6\text{D}_6$ , ppm):  $\delta = 8.09\text{--}7.97$  (m, 16H,  $H_{\text{aromatics}}$ ), 7.28–6.96 (m, 46H,  $H_{\text{aromatics}}$ ), 2.95 (m, 4H,  $\text{CH}_2$  dppe), 1.78 (m, 4H,  $\text{CH}_2$  dppe), 1.45 (s, 30H,  $\text{C}_5(\text{CH}_3)_5$ ).  $^{31}\text{P}$  NMR (121 MHz,  $\text{C}_6\text{D}_6$ , ppm):  $\delta = 99.6$  (s, 4P, dppe),  $-10.3$  (s, 2P,  $\text{PPh}_2$ ).

## 2. Synthesis of Pd(II) Complexes with Fe(III) Metallo-Phosphanes

**[{Fe( $\kappa^2$ -dppe)( $\eta^5$ - $\text{C}_5\text{Me}_5$ )( $\text{C}\equiv\text{CPh}_2$ )]Pd( $\mu$ -Cl)Cl} $_2$ ][ $\text{PF}_6$ ] $_2$  (4) by Chemical Oxidation of**

**3.** In a Schlenk tube, {[Fe( $\kappa^2$ -dppe)( $\eta^5$ - $\text{C}_5\text{Me}_5$ )( $\text{C}\equiv\text{CPh}_2$ )]Pd( $\mu$ -Cl)Cl} $_2$  (**3**; 195.2 mg, 0.1 mmol) and [FcH][ $\text{PF}_6$ ] (66.2 mg, 0.2 mmol) were dissolved in dichloromethane (5 mL) and

stirred for 1 h at room temperature. Addition of *n*-pentane and filtration gave the title complex as black solid (220 mg, 98%).

**[{Fe( $\kappa^2$ -dppe)( $\eta^5$ -C<sub>5</sub>Me<sub>5</sub>)(C≡CPh<sub>2</sub>)Pd( $\mu$ -Cl)Cl<sub>2</sub>][PF<sub>6</sub>]<sub>2</sub> (4) from Diphosphane Dimer 1[PF<sub>6</sub>]<sub>2</sub> and a Pd(II) Precursor.** In a Schlenk tube, [{Fe( $\kappa^2$ -dppe)( $\eta^5$ -C<sub>5</sub>Me<sub>5</sub>)(C≡C)PPh<sub>2</sub>}]<sub>2</sub>[PF<sub>6</sub>]<sub>2</sub> (**2**; 95 mg, 0.05 mmol) and [Pd(1,5-cod)Cl<sub>2</sub>] (28.5 mg, 0.1 mmol) were dissolved in dichloromethane (5 mL) and stirred for 1 h at room temperature. Removal of the solvent after vacuum gave the title complex as a unique product in nearly quantitative yield (*ca.* 100 %). X-ray quality crystals were grown from slow diffusion of pentane in a dichloromethane solution of the complex. IR (KBr,  $\nu$  in cm<sup>-1</sup>): 1975 (s, C≡C), 838 (s, PF<sub>6</sub>). CV (CH<sub>2</sub>Cl<sub>2</sub>, vs. SCE, 0.1 M [*n*-Bu<sub>4</sub>N][PF<sub>6</sub>]): E<sup>1</sup><sub>1/2</sub> = 0.16 V, E<sup>2</sup><sub>1/2</sub> = 0.25 V. <sup>1</sup>H NMR (300 MHz, CD<sub>2</sub>Cl<sub>2</sub>, ppm):  $\delta$  = 12.5, 8.7, 7.7, 7.4, 6.7, 6.0, 3.1, 2.5, 0.1, -1.0, -3.6, -8.5.

**[*trans*-{Fe( $\kappa^2$ -dppe)( $\eta^5$ -C<sub>5</sub>Me<sub>5</sub>)(C≡CPh<sub>2</sub>)<sub>2</sub>PdCl<sub>2</sub>][PF<sub>6</sub>]<sub>2</sub> (6) by Chemical Oxidation of 5.** In a Schlenk tube, *trans*-{Fe( $\kappa^2$ -dppe)( $\eta^5$ -C<sub>5</sub>Me<sub>5</sub>)(C≡CPh<sub>2</sub>)<sub>2</sub>PdCl<sub>2</sub> (**5**; 177.5 mg, 0.1 mmol) and [FcH][PF<sub>6</sub>] (66.2 mg, 0.2 mmol) were dissolved in dichloromethane (5 mL) and stirred for 1 h at room temperature. Addition of *n*-pentane and filtration gave the title complex as black solid (200 mg, 97%).

**[*trans*-{Fe( $\kappa^2$ -dppe)( $\eta^5$ -C<sub>5</sub>Me<sub>5</sub>)(C≡CPh<sub>2</sub>)<sub>2</sub>PdCl<sub>2</sub>][PF<sub>6</sub>]<sub>2</sub> (6) from Diphosphane Dimer 3[PF<sub>6</sub>]<sub>2</sub> and a Pd(II) Precursor.** In a Schlenk tube, [{Fe( $\kappa^2$ -dppe)( $\eta^5$ -C<sub>5</sub>Me<sub>5</sub>)(C≡CPh<sub>2</sub>)}]<sub>2</sub>[PF<sub>6</sub>]<sub>2</sub> (**2**; 95 mg, 0.05 mmol) and [Pd(1,5-cod)Cl<sub>2</sub>] (14.2 mg, 0.05 mmol) were dissolved in dichloromethane (5 mL) and stirred for 1 h at room temperature. Removal of the solvent after vacuum gave *the title complex* as a unique product in nearly quantitative yield (*ca.* 100 %). IR (KBr,  $\nu$  in cm<sup>-1</sup>): 1971/1916 (w, C≡C), 838 (s, PF<sub>6</sub>). CV

(CH<sub>2</sub>Cl<sub>2</sub>, vs. SCE, 0.1 M [*n*-Bu<sub>4</sub>N][PF<sub>6</sub>]): E<sup>1</sup><sub>1/2</sub> = -0.02 V, E<sup>2</sup><sub>1/2</sub> = 0.11 V. <sup>1</sup>H NMR (300 MHz, CD<sub>2</sub>Cl<sub>2</sub>, ppm): δ = 12.3, 9.5, 7.8, 7.6, 7.4, 6.9, 5.5, 3.3, 3.0, 0.1, -1.8, -8.7.

### 3. Evans<sup>1</sup> Measurements on 4 and 6

The difference in frequency between the TMS signals of the paramagnetic solution and of the reference solution, gives access to the magnetic susceptibility ( $\chi_M$ ) and, subsequently, the effective magnetic moment ( $\mu_{\text{eff}}$ ), according to eqs 1 – 3<sup>2</sup>:

$$\chi_s = \frac{3 \cdot \Delta f}{4 \cdot \pi \cdot m} + \chi_0 \quad (1)$$

$\Delta f$ : frequency difference (Hz)

$m$ : concentration of the complex studied (g/mL)

$\chi_0$ : magnetic susceptibility of the solvent (emu/g).

$$\chi_M = \chi_s \cdot M \quad (2)$$

$M$ : molecular weight of the compound studied (g)

$$\mu_{\text{eff}} = (8 \cdot \chi_M \cdot T)^{1/2} \quad (3)$$

$T$ : temperature (K)

Thus, taking *ca.* 20 mg/mL of the complexes, we find at 295 K  $\mu_{\text{eff}}$  values of  $2.2 \pm 0.1 \mu_B$  and of  $2.4 \pm 0.1 \mu_B$  for **4** and for **6**, respectively, when using a classical value of  $\chi_0 = -0.549 \times 10^{-6} \text{ cm}^3 \cdot \text{g}^{-1}$  for CD<sub>2</sub>Cl<sub>2</sub>.<sup>3</sup> Within experimental uncertainty, the two values are the same, and have values that are approximately 75 % of those that would be expected for a  $S = 1$  compound ( $3.04 \mu_B$ ) when using a quite classical value of 2.15 for the isotropic  $g$  factor of **4** and **6** in

<sup>1</sup> Evans, D. F.; *J. Chem. Soc.*, **1959**, 2003 – 2005.

<sup>2</sup> Sur, S. K.; *J. Magn. Res.*, **1988**, 82, 169 – 173.

<sup>3</sup> *CRC Handbook of Chemistry and Physics*, 52nd Ed.; The CRC Publishing Company: Cleaveland, 1971.

solution.<sup>4</sup> This means that they correspond well to the value expected for two uncoupled spins at room temperature.

#### 4. Reaction of **4** with **2**

In an NMR tube, [ $\{\text{Fe}(\kappa^2\text{-dppe})(\eta^5\text{-C}_5\text{Me}_5)(\text{C}\equiv\text{CPh}_2)\}_2$ ][PF<sub>6</sub>]<sub>2</sub> (**2**; 18.9 mg, 10  $\mu\text{mol}$ ) and [ $\{\text{Fe}(\kappa^2\text{-dppe})(\eta^5\text{-C}_5\text{Me}_5)(\text{C}\equiv\text{CPh}_2)\}\text{Pd}(\mu\text{-Cl})\text{Cl}\}_2$ ][PF<sub>6</sub>]<sub>2</sub> (**4**; 11.3 mg, 5  $\mu\text{mol}$ ) were dissolved in CD<sub>2</sub>Cl<sub>2</sub> (1 mL). The mixture was left to react for 15 min at room temperature then checked by NMR spectroscopy. The complex [*trans*- $\{\text{Fe}(\kappa^2\text{-dppe})(\eta^5\text{-C}_5\text{Me}_5)(\text{C}\equiv\text{CPh}_2)\}_2\text{PdCl}_2$ ][PF<sub>6</sub>]<sub>2</sub> (**6**) was the largely dominant (> 95 %) species in solution, along with traces of decomposition products.

The above reaction was repeated with a twofold excess of **2** (37.8 mg) to give the same outcome at the end. Of course, one equivalent of starting dimer **2** was also identified in the medium alongside to the product **6**.

---

<sup>4</sup> Paul, F.; Toupet, L.; Thépot, J.-Y.; Costuas, K.; Halet, J.-F.; Lapinte, C. *Organometallics* **2005**, *24*, 5464-5478.

## 5. Cyclic Voltammograms of **3** and **5**

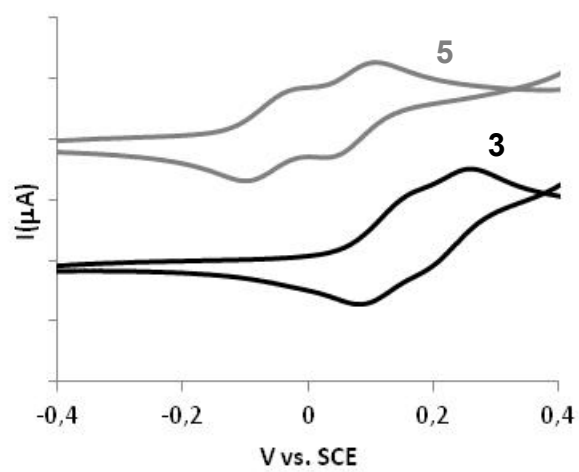

Figure S1. Cyclic Voltammograms of **3** and **5** in  $\text{CH}_2\text{Cl}_2$  at 25 °C,  $[\text{NBu}_4][\text{PF}_6]$  (0.1 M) at 0.1 V/s.
